# Supplementary material for: Strain heterogeneity in a non-pathogenic Aspergillus fungus highlights factors associated with virulence
Source: PubMed Central journal article supplement — Commun Biol. 2024 Sep 4;7:1082. doi: 10.1038/s42003-024-06756-8 (PMC11374809; doi:10.1038/s42003-024-06756-8), 2024-09-04
Supplement: 42003_2024_6756_MOESM1_ESM.pdf [file 42003_2024_6756_MOESM1_ESM.pdf]

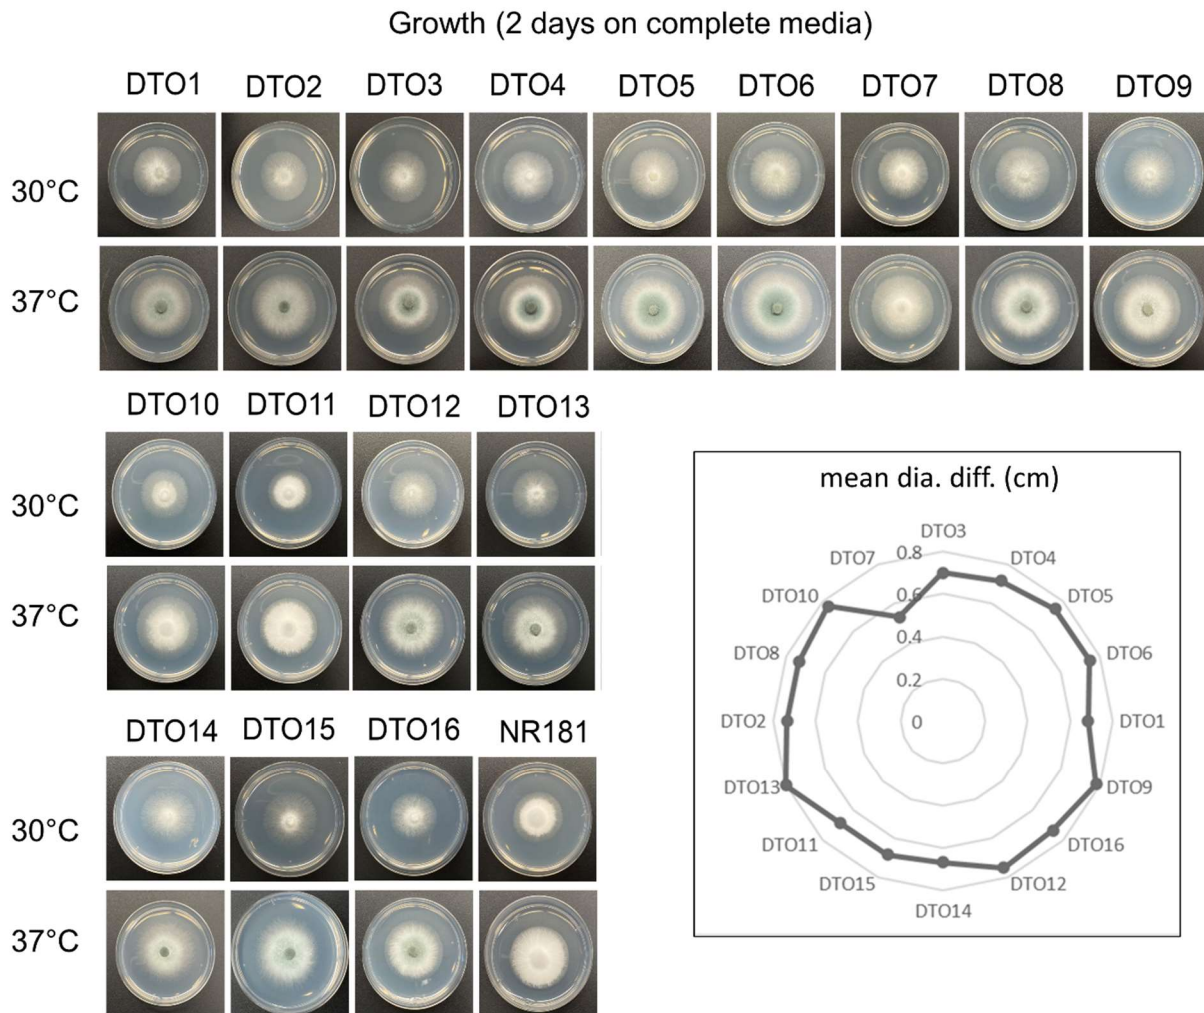

**Figure S1: Growth assay reveals differences between strains and temperatures.**

Representative images of the 16 *A. fischeri* strains used in this study following 2 days of growth on complete minimal media at 30°C and 37°C. Radar chart shows the amount of additional growth diameter observed at 37°C compared to 30°C (the mean differences in size of 3 replicates of each strain are shown). At 37°C, growth was substantially accelerated in all strains, with most strains displaying some degree of conidial melanization that was not present at 30°C. The sole exception was DTO7, which grew much more slowly. We observed conidiation in all strains and conidia were routinely counted under the microscope to adjust inoculum concentrations. We did not observe ascospores in these growth conditions.

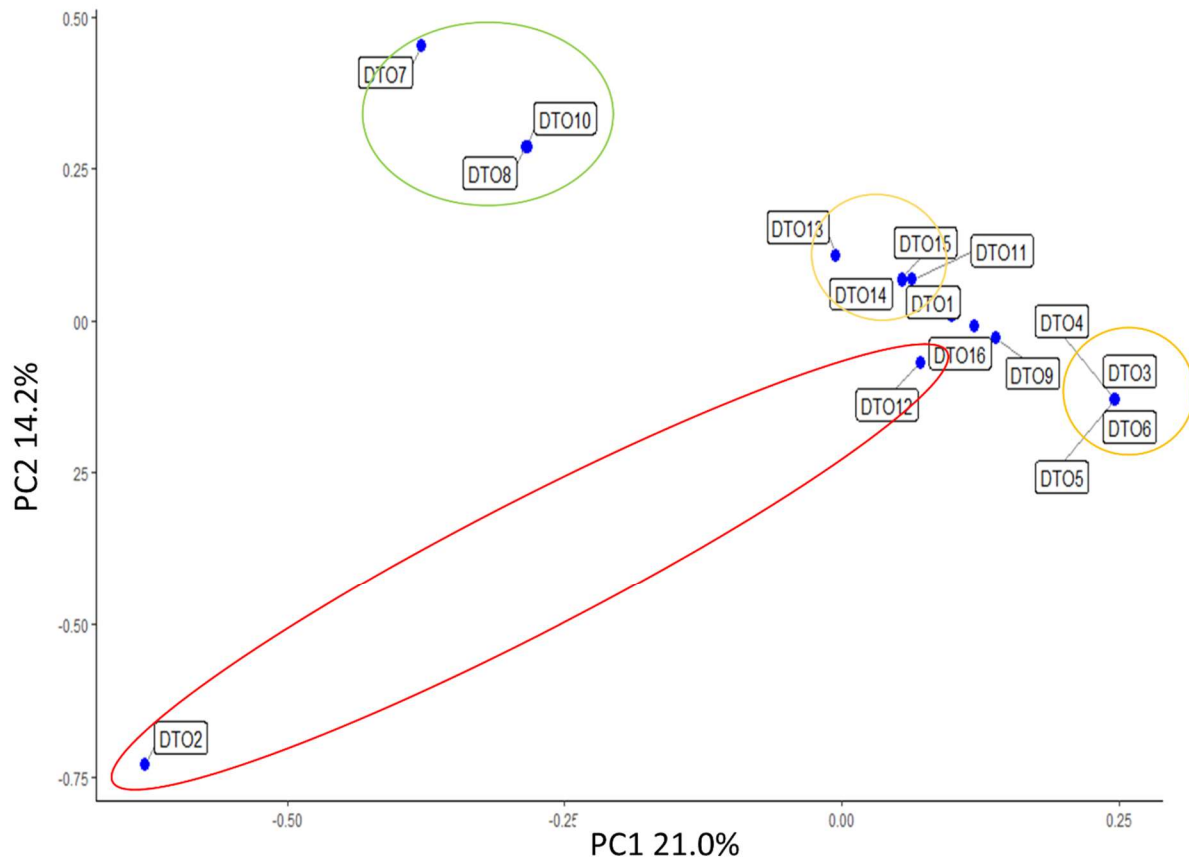

**Figure S2: Single nucleotide variant-based distances consistent with intraspecific relationships inferred by other methods.**

Principal components analysis (PCA) of intraspecific distances from the subset of single nucleotide variants (SNVs) used in the population assignment analysis using the ADMIXTURE package. PCA distances between strains are consistent with relationships revealed by genetic structure analyses using DAPC (Discriminant Analysis of Principal Components) (Figure 3C) and the strain phylogeny (Figure 3A).

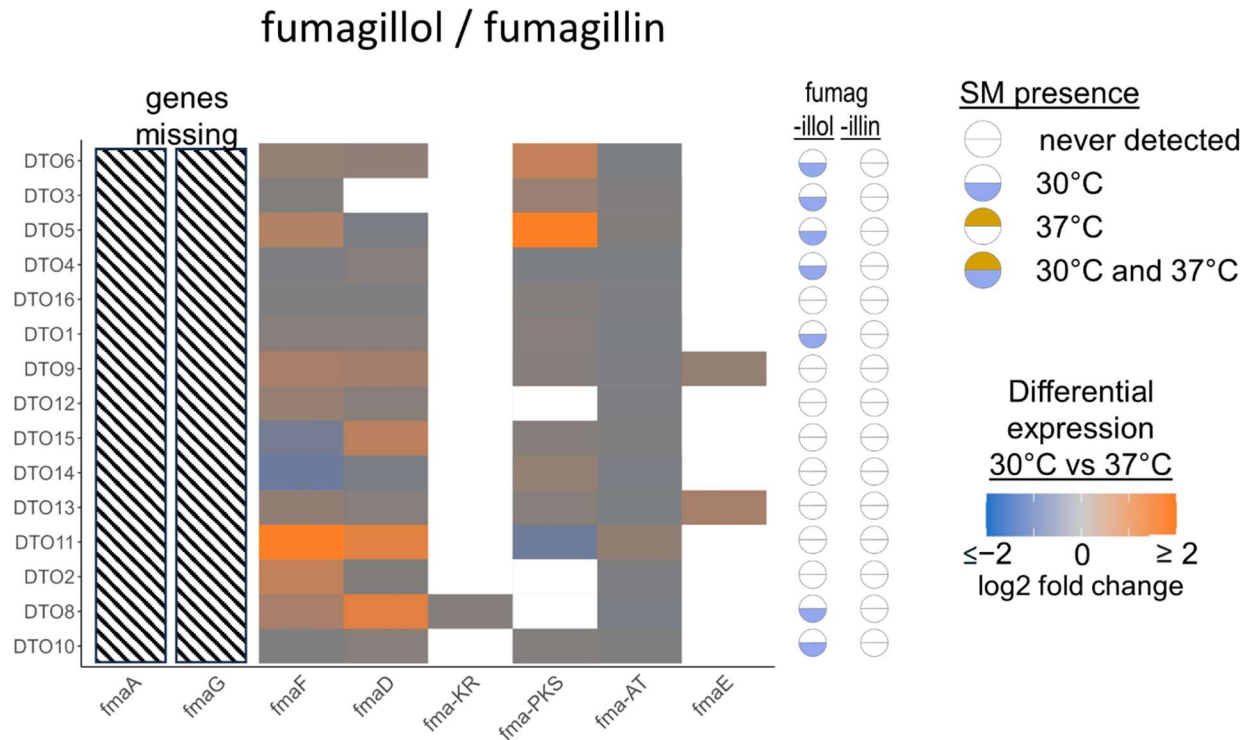

**Figure S3: Fumagillin BGC in all *A. fischeri* genomes lacks genes present in the canonical version yet intermediate products are detectable.**

Temperature-dependent differential expression of genes of the fumagillin BGC. Orthologs of the *fmaA* (*Afu8g00520*) and *fmaG* (*Afu8g00510*), both of which are present in the canonical version of the *A. fumigatus* BGC, are absent in the genomes of all *A. fischeri* strains (hatched areas). However, fumagillol, an intermediate metabolite of the fumagillin biosynthetic pathway, is detected in seven strains at 30°C. This suggests that the *A. fischeri* pathway for fumagillin biosynthesis is at least partially functional in some strains.

## ADMIXTURE cross-validation errors

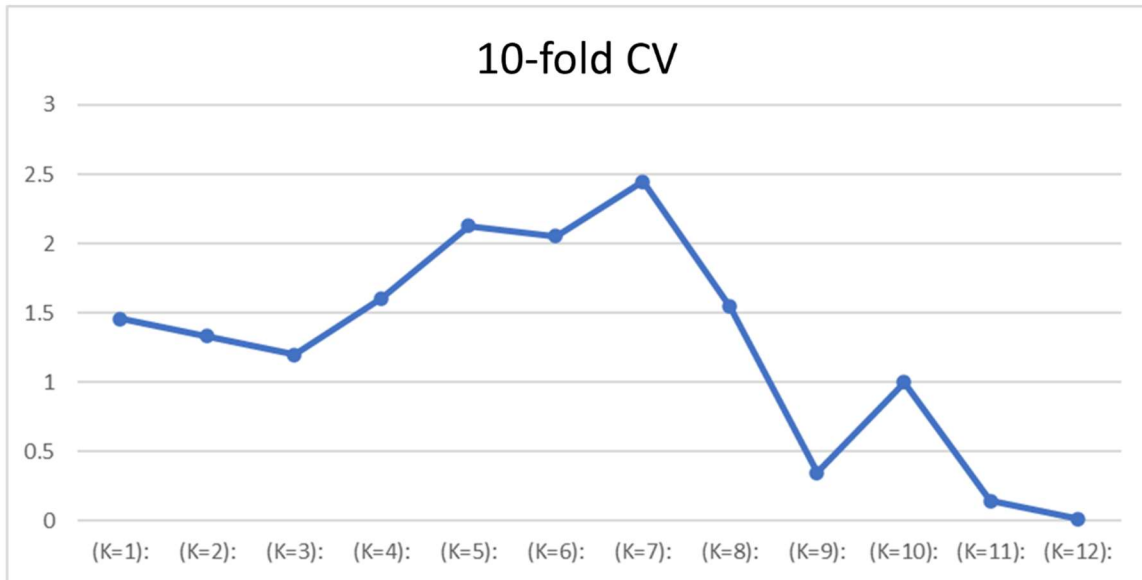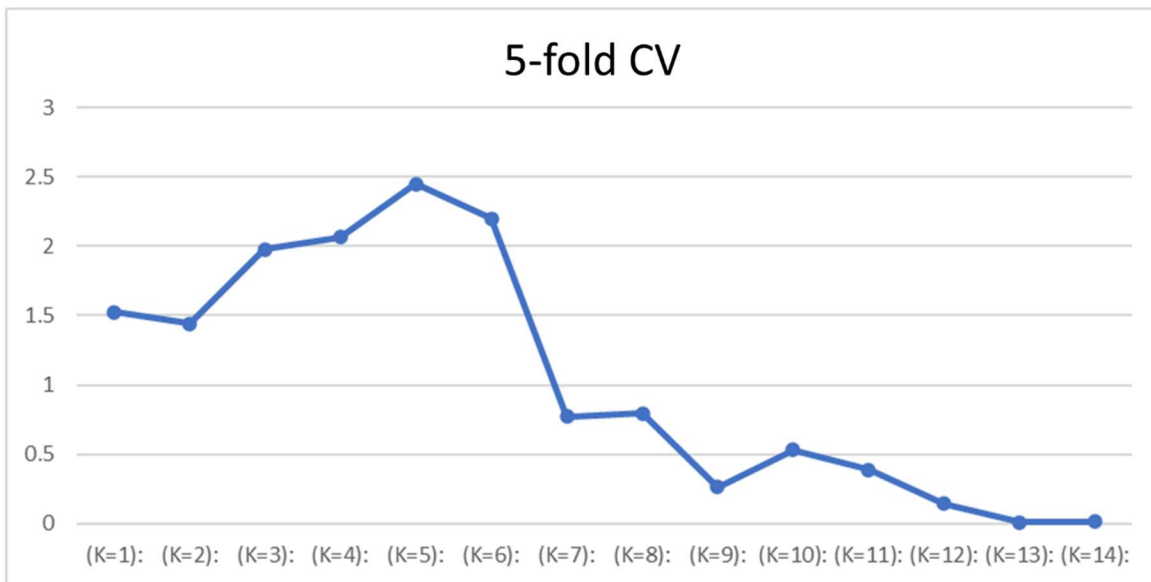

Figure S4: ADMIXTURE cross validation curves.

Shown are both the 10-fold and 5-fold cross validation results for all 16 strains of *A. fischeri*. Local minima for 10-fold CV supports  $K=3$ , while the 5-fold supports  $K=2$ .

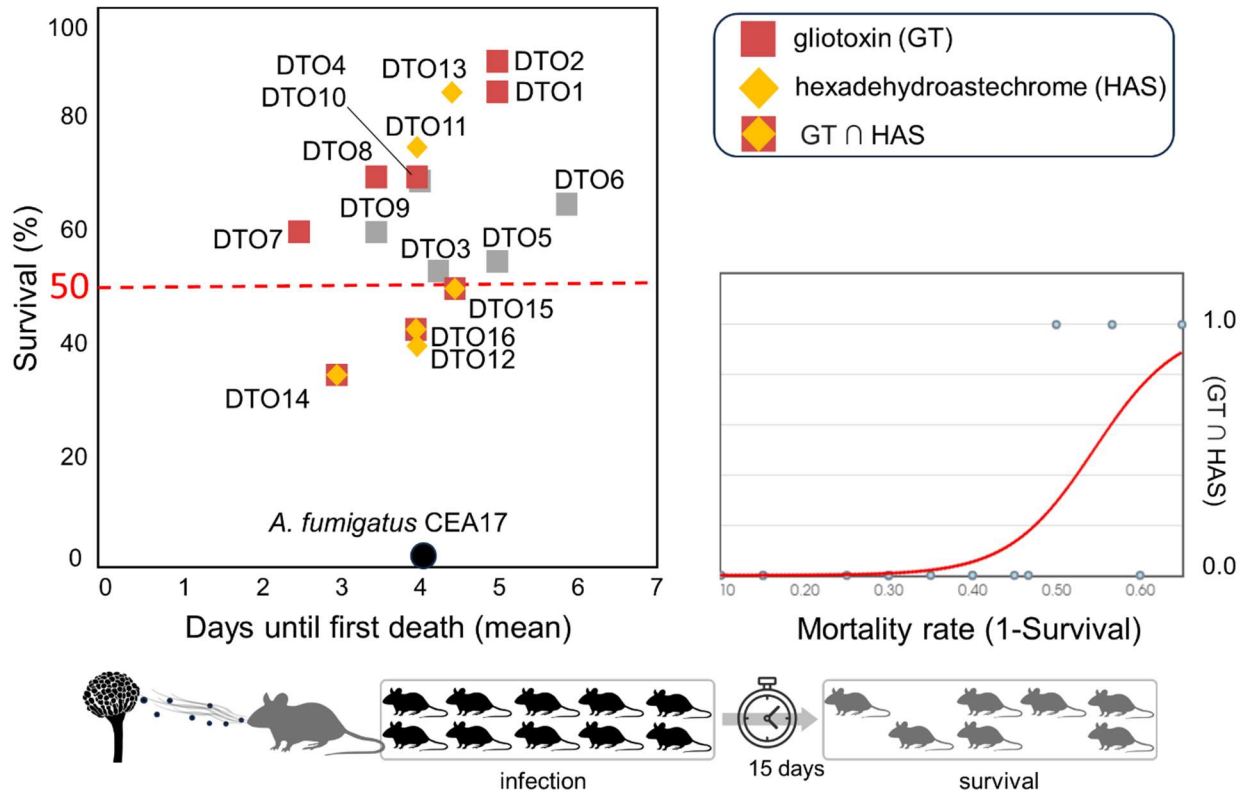

Figure S5: Production of both the gliotoxin and hexadehydroastechrome secondary metabolites is significantly associated with *A. fischeri* virulence.

Occurrence of the gliotoxin and hexadehydroastechrome secondary metabolites with respect to virulence in mice (*c.f.*, Figure 2). Both secondary metabolites are detected at 37°C in 3 of the 4 most virulent strains (DTO14, DTO15, and DTO16;  $\geq 50\%$  mortality). Logistic regression curve (red line) where the independent variable (x-axis) is mortality in a mouse model of pulmonary aspergillosis, and the dependent variable (y-axis) is indicating the presence (1) or absence (0) of the [gliotoxin + hexadehydroastechrome] metabolite pair. This model provides support to the hypothesis that higher mortality can be confidently related back to the simultaneous presence of these compounds in *A. fischeri* strains ( $\chi^2=7.9913$ ,  $p$  value=0.0047).

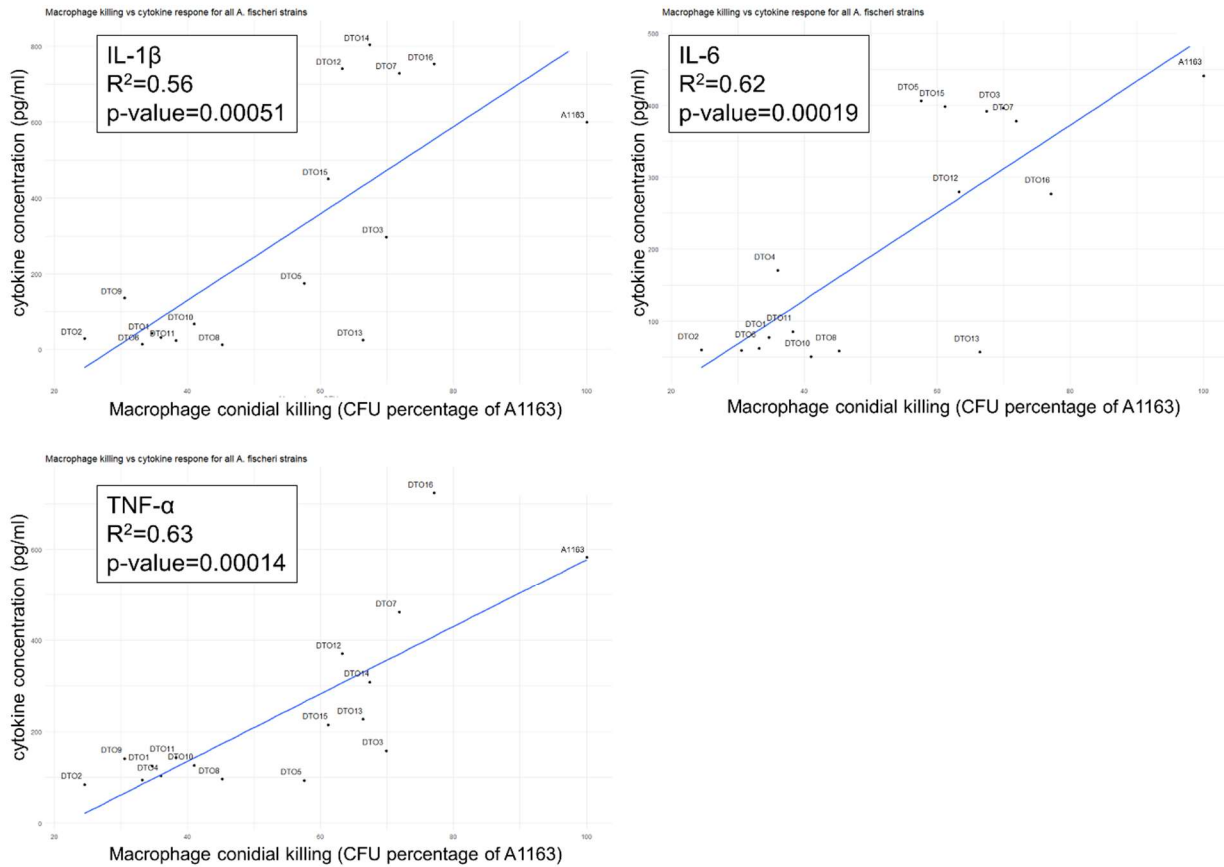

**Figure S6: Linear relationship between cytokine response and spore survival in each of the 16 *A. fisheri* strains.**

Results of linear regressions performed on the *in vivo* experimental data (mean values) of each measured, pro-inflammatory cytokine and the spore survival in the presence of macrophages. Summary statistics show the Spearman's correlation ( $R^2$ ) and the Wald test p-value.

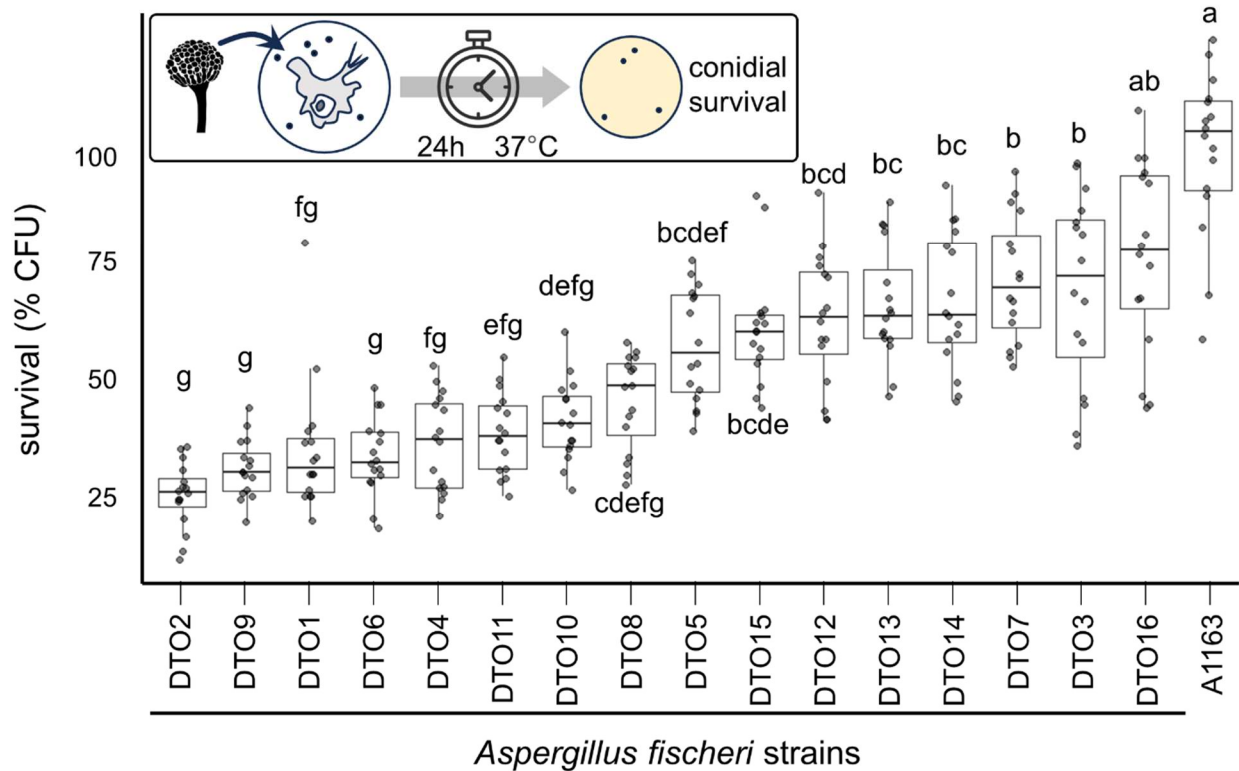

**Figure S7: Highly variable survival of *A. fischeri* spores in the presence of murine macrophages.**

Survival of conidia (asexual spores) from 16 *A. fischeri* strains (DTO1 - DTO16) as estimated by the number of colony-forming units (CFU) recovered after 24 hours (h) of exposure to bone marrow-derived macrophages (BMDMs) at 37°C. The clinically derived and highly virulent A1163 strain of the major pathogen *A. fumigatus* was used as a reference. Boxplots show the mean and interquartile range; whiskers show max/min values of data that are within  $\pm 1.5 \times$  the interquartile range, respectively. Letters represent the compact letter display of a Tukey HSD *post hoc* test following single factor ANOVA.
